# Supplementary material
Source: ML conference proceedings conference paper supplement (https://openreview.net/forum?id=rHMaBYbkkRJ)
Supplement: supplementary_material [file attachment]

# The Continual Learning Evaluation Assessment (CLEVA) Compass

To make the CLEVA-Compass as accessible as possible and disseminate in a convenient way, we provide three options for practical use.

1. We provide a **LaTeX template** for the CLEVA-Compass, making use of the TikZ library to draw the compass within LaTeX. We envision that such a template makes it easy for other authors to include a compass into their future submission, where they can adapt the naming and values of the entries respectively.
2. We further provide a **Python script** to generate the CLEVA-Compass. In fact, because the use of drawing in LaTeX with TikZ may be unintuitive for some, we have written a Python script that automatically fills the above LaTeX template, so that it can later simply be included into a LaTeX document. The Python script takes a path to a JSON file that needs to be filled by the user with the CLEVA-Compass options. We further provide a default JSON file that is easy to adapt.
3. To further lower the barrier for dissemination and use, we also provide a **CLEVA-Compass Graphical User Interface (GUI)**. The GUI makes it easy for users to simply "click together" their desired compasses, save images or export to LaTeX, and conversely import already existing compass

## Create the CLEVA-Compass using the GUI

### CLEVA Compass Generator

Label

Color

magenta

green

blue

orange

cyan

brown

Inner Level

(mouse-over items for info tooltips)

multiple models

UnsupervisedSupervisedNone

federated

UnsupervisedSupervisedNone

online

UnsupervisedSupervisedNone

open world

UnsupervisedSupervisedNone

multiple modalities

UnsupervisedSupervisedNone

active data query

UnsupervisedSupervisedNone

task order discovery

UnsupervisedSupervisedNone

task agnostic

UnsupervisedSupervisedNone

episodic memory

UnsupervisedSupervisedNone

generative

UnsupervisedSupervisedNone

uncertainty

UnsupervisedSupervisedNone

Outer Level

compute time

forward transfer

memory

per task metric

mac operations

communication

forgetting

backward transfer

openness

parameters

optimization steps

task order

data per task

Export to Image →

Export to Tex File →

Reload Preview →

Compass Entries

(select to delete/update)

Example Method (Author et al., 2021) (green)

← Add Compass Entry

← Delete Compass Entry

← Update Compass Entry

← Export Entry to File

← Import Ent. from File(s)

The CLEVA-Compass GUI can be run using Python: `python cleva_gui.py`. The application requires at least `TkInter` to be installed (Ubuntu: `apt install python3-tk`, Fedora: `dnf install python3-tkinter`, Arch Linux: `pacman -S tk`, MacOS: `brew install python-tk`). For the interactive visualization of the CLEVA-Compass, the system-wide `Poppler` library is necessary (Ubuntu: `apt install poppler-utils`, Fedora: `dnf install poppler`, Arch Linux: `pacman -S poppler`, MacOS: `brew install poppler`) as well as a few additional Python dependencies are required (see [gui\\_requirements.txt](#), install with `pip install -r gui_requirements.txt`).

The GUI exposes tooltips on mouse-hover to display information on button actions and inner/outer level options. The main idea is that users create their own CLEVA-Compass visualization by interactively generating entries for specific methods. The list of current entries is shown on the bottom right in the GUI. A method entry consists of a unique label, a selected color, and inner/outer level options. If all is set, the `Add Compass Entry` button can be pressed and the entry will be listed below. Entries can be deleted when selected with the `Delete Compass Entry` button. A selected entry can also be change and its updated options stored when the `Update Compass Entry` button is pressed. The Compass preview can be generated explicitly, based on the current set of entries, using the `Reload Preview` button. Furthermore, entries can be imported (`Import Ent. from File(s)`) and exported (`Export Entry to File`) as a JSON file for serialization purposes, as well as SVG/PNG images (`Export to Image`) or as TikZ LaTeX code (`Export to Tex File`) which can be readily included into LaTeX documents.

## Create the CLEVA-Compass using the Python Script

You can use the `create_compass.py` python script to generate a compass and specify how it is filled for each continual approach in a JSON file:

```
$ python create_compass.py -h
usage: create_compass.py [-h] [--template TEMPLATE] [--output OUTPUT] [--data DATA]

CLEVA-Compass Generator.

optional arguments:
  -h, --help            show this help message and exit
  --template TEMPLATE  Tikz template file. (default: cleva_template.tex)
  --output OUTPUT       Tikz filled output file. (default: cleva_filled.tex)
  --data DATA          Entries as JSON file. (default: data.json)
```

For this purpose we provide the template file `cleva_template.tex`.

## Example Usage

The default reads the template file from `cleva_template.tex` and writes the filled output file into `cleva_filled.tex` with the data specified via `--data <JSON_FILE>`:

```
$ python --data examples/compass_data_0.json
```

An "empty" CLEVA-Compass, generated with `examples/compass_data_0.json`, looks like this:

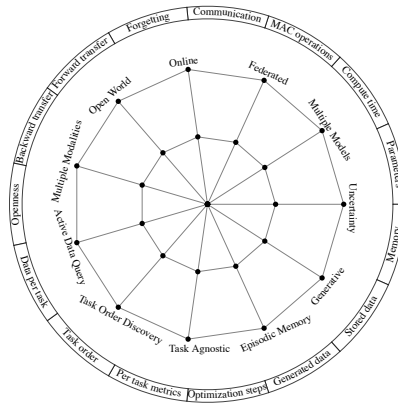

In the next section, we specify how to add methods to the json file to fill the compass.

## JSON Data Format

The JSON file specifies a list of `entries`, where each element defines a `color`, `label` (can contain escaped TeX commands, such as citations), `inner_level`, and `outer_level`. The latter two specify the attributes visualized in the compass.

- `color`: Can be one of `["magenta", "green", "blue", "orange", "cyan", "brown"]`.
- `label`: A label describing the compass entry (can contain arbitrary, escaped TeX commands such as citations).
- `inner_level`: Specifies the inner compass level attributes. Attribute values must be one of:
  - `0`: does not apply
  - `1`: supervised
  - `2`: unsupervised
- `outer_level`: Specifies the outer compass level attributes. Attribute values must be boolean (`true` / `false`).

The `compass_data_1.json` file is given as an example:

```
json { "entries": [ { "color": "magenta", "label": "FedWeIT", "inner_level": { "multiple_models": 1, "federated": 2, "online": 0, "
```

The resulting file `compass_filled.tex` can then be included into any LaTeX document, e.g.:

```
\begin{figure}
  \input{compass_filled.tex}
  \caption{CLEVA-Compass for methods Foo, Bar, and Baz.}
\end{figure}
```

With the above example, this results in the following visualization:

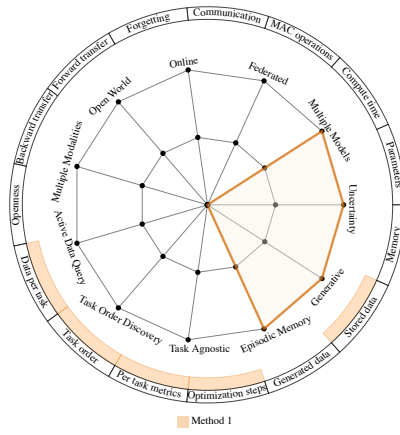

A JSON file with multiple entries ( [examples/compass\\_data\\_3.json](#) ) produces the following compass:

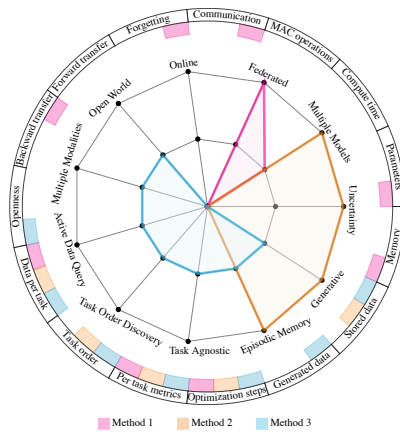

If you want to directly modify a filled template without using the Python script described below, we also provide `cleva_filled.tex` as an example with three entries, which corresponds to the results of `python create_compass.py --data examples/compass_data_3.json`.
